# Supplementary material
Source: PubMed Central journal article supplement (PMC4187864)
Supplement: IAI.01416-13_zii999090816so1.pdf [file IAI.01416-13_zii999090816so1.pdf]

1 **Supplemental Figures and Tables**

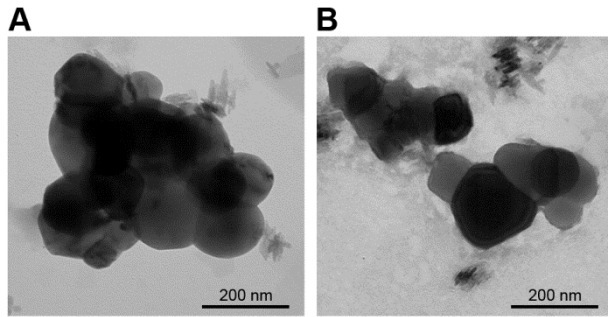

3 Fig. S1. TEM analysis of OMVs from two different growth conditions.

4 *Salmonella* OMVs isolated from LB (A) and acidic MgM (B) conditions were mounted onto  
5 carbon-coated copper grids and subjected to negative staining using uranyl acetate. The stained  
6 grids were observed using a LIBRA 120 transmission electron microscope.

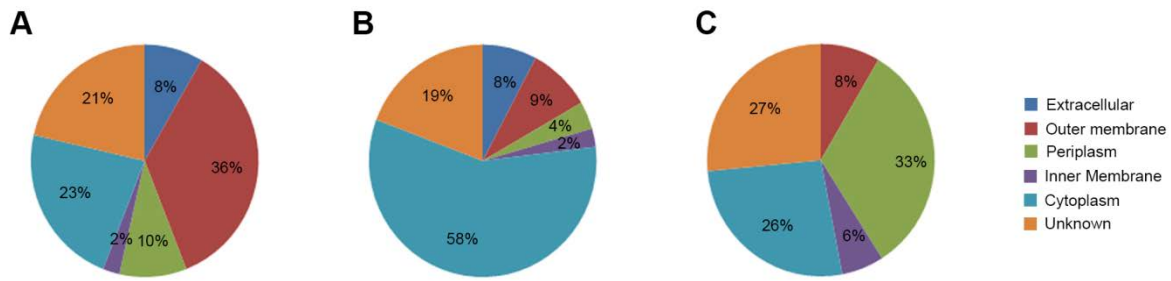

7

8 Fig. S2. Differences in the subcellular distribution of OMV-associated proteins between the two  
 9 growth conditions.

10 The PSORTb prediction was applied to three groups of proteins to determine their subcellular  
 11 locations: 84 OMV proteins found in both growth conditions (A), 78 OMV proteins detected  
 12 only in the LB condition (B), and 83 OMV proteins determined only in the acidic MgM  
 13 condition (C). The percentage of each subcellular location in each protein group is shown.

14

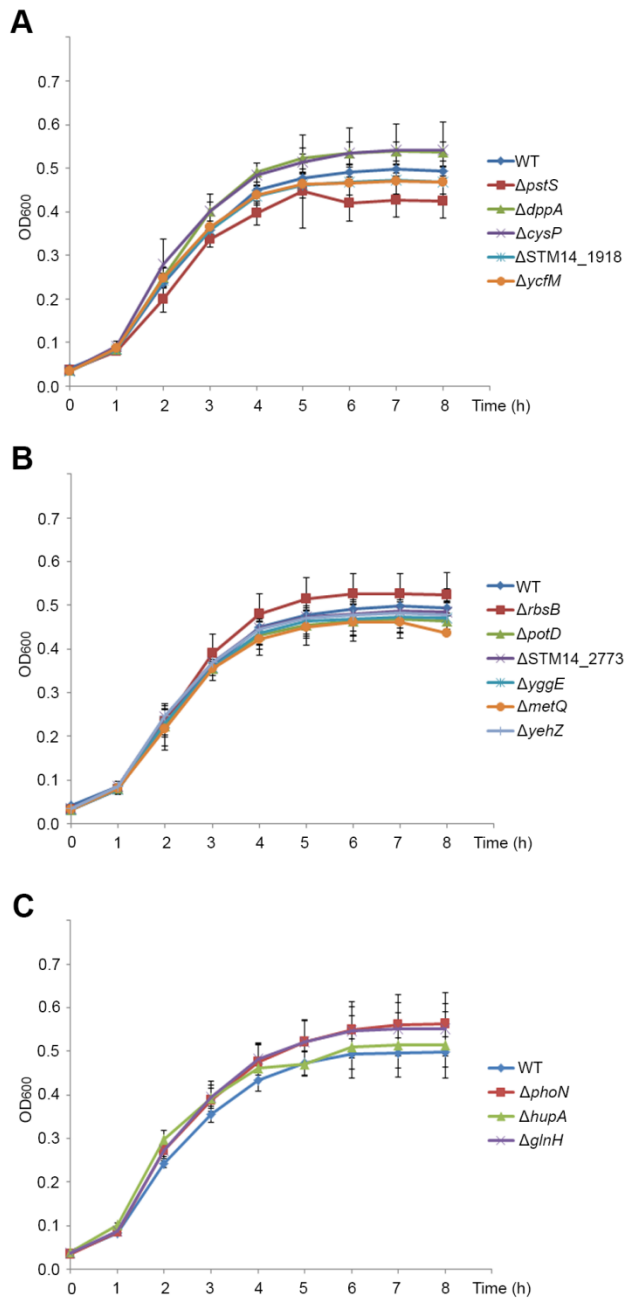

15

16 Fig. S3. *In vitro* growth curves of mutant strains tested in this study.

17 The *Salmonella* mutant strains that showed decrease or increase in intracellular survival were  
 18 grown under acidic MgM conditions to compare their growth *in vitro*: five (A) and six (B)

19 mutant strains that exhibited attenuated and higher intracellular survival, respectively, in Fig. 3A,  
20 and three (C) strains that exhibited impaired survival inside macrophages in Fig. 4B. Their  
21 average growth curves (and standard deviations) from three independent experiments are plotted.  
22 ANOVA was applied for the statistical analysis of the data from each time point, and there was  
23 no significant difference in the growth between the mutants and the wild-type strain ( $P < 0.05$ ).

24

Table S1. Primer sequences used in this study

| Gene        | Forward (5' to 3')                                               | Reverse (5' to 3')                                               | Purpose  |
|-------------|------------------------------------------------------------------|------------------------------------------------------------------|----------|
| <i>tbpA</i> | TCTCAAGTCCTTTGCCACTCTTAACTGAGGTGCAAAG<br>TGGTGTAGGCTGGAGCTGCTTC  | ATTCGCTAATCCATGCCTGGCGTTGTGCTGCCACTTGTT<br>GTTCCGGGGATCCGTCGACCT | Deletion |
| <i>metQ</i> | GTAAACACAACACAAATACTCATTAAAGGAAATAAGCA<br>TGGTGTAGGCTGGAGCTGCTTC | GGAATCAGCCTAAAACCTACCAGCCTTTCACCGCGCCG<br>CCTTCCGGGGATCCGTCGACCT | Deletion |
| STM14_0360  | ACTTGTCTTTTAGCCCAATATTAAGGCAGGTTCTGAAAT<br>GGTGTAGGCTGGAGCTGCTTC | GTGTTTAAAAGGCGTAAGTAATGCCGAGCATGAAGTCA<br>TTTCCGGGGATCCGTCGACCT  | Deletion |
| <i>foxA</i> | CATCTCTAAAAGGTAATAATTCTTATTTACAATAAAGAT<br>GGTGTAGGCTGGAGCTGCTTC | CGGACGATAAGCGTTATCAAAACGCCCATGACACGCTG<br>CCTTCCGGGGATCCGTCGACCT | Deletion |
| <i>sfbA</i> | TCCGGCACAGCATCACACTATTTAAAATGGAGAAATTAT<br>GGTGTAGGCTGGAGCTGCTTC | ATGGCCACCGCTGCGATCAGGGTGTGCGGGTCATCCAT<br>TCTTCCGGGGATCCGTCGACCT | Deletion |
| <i>fepA</i> | TGGCTTATGTGGCTAAAGAAAAGCAGGATATACAATGA<br>ACGTGTAGGCTGGAGCTGCTTC | GGAGGGAAGGTTGCCATCAGAAATGGGTATTAATGCTC<br>ATTTCCGGGGATCCGTCGACCT | Deletion |
| <i>gltI</i> | CAACATCACAATAGCTATCAATGCGTCGACGGCGCAGA<br>TGGTGTAGGCTGGAGCTGCTTC | TCCCATTTAGTTTTAGTTAGTTAAGCGCTTTATCATTCCG<br>TTCCGGGGATCCGTCGACCT | Deletion |
| <i>fhuE</i> | TCCTGAACTTACCCCAATAACAAGCAAGGATTTTCAGA<br>TGGTGTAGGCTGGAGCTGCTTC | GCTCTCCGACAGTCTGTCAGAACTGATAATTGGCGGTG<br>AGTTCCGGGGATCCGTCGACCT | Deletion |
| <i>yefM</i> | GTCAGGCTTTATCTTTATTTGTGAGGAGTGAATTTTGAT<br>GGTGTAGGCTGGAGCTGCTTC | CCGCACCTTTACCTGACCAGATTATCTCGCCAGTTTGCA<br>CTTCCGGGGATCCGTCGACCT | Deletion |
| <i>potD</i> | CAAGGGCCGATAAGGCCCGTAATTCAGGGGACGTTAAA<br>TGGTGTAGGCTGGAGCTGCTTC | AGGCGCTTTGGCTGAATTAGCGTCCTGCTTTTAGCTTCT<br>GTTCCGGGGATCCGTCGACCT | Deletion |
| STM14_1918  | GAAGCAGCTATACACGTTTTTATCAAAGGGAGTCGTCA<br>TGGTGTAGGCTGGAGCTGCTTC | CCCCTCCATACCCTATTTACAGAGCAATGCGAATAACAT<br>CTTCCGGGGATCCGTCGACCT | Deletion |
| <i>oppA</i> | AAAAACCAGTAATTATAATGAGTGGAGTACAAACACAA<br>TGGTGTAGGCTGGAGCTGCTTC | GTCCCATGTCTTGCCATTAATGTTTGATAATATATAAGTT<br>TTCCGGGGATCCGTCGACCT | Deletion |
| <i>fliY</i> | CAGTCTATGGTCATTAACGGCAATATTCGGGGTTACTAT<br>GGTGTAGGCTGGAGCTGCTTC | CGGGCAACGTAGAACATTATTGGGTCACGTCAGCGCCA<br>AATTCCGGGGATCCGTCGACCT | Deletion |
| <i>yehZ</i> | TCTCTGAAAAAGGCCGTAAGGATGAGGAAAGCATC<br>ATGGTGTAGGCTGGAGCTGCTTC   | CAGCATCACTCACAGATTACTTCACCCACCCTTTTTGTC<br>GTTCCGGGGATCCGTCGACCT | Deletion |
| STM14_2773  | GGTTAAAATAACTATTGACATTGAAATGGTGGTGGAG<br>TGGTGTAGGCTGGAGCTGCTTC  | TAATTGTTATTCAACTTCAGAAATTATAACTAATTGAAG<br>CTTCCGGGGATCCGTCGACCT | Deletion |

|             |                                                                   |                                                                  |              |
|-------------|-------------------------------------------------------------------|------------------------------------------------------------------|--------------|
| <i>cysP</i> | GACCATAAGAAAGTCATTAATTTATAAGGGTGCGCAA<br>TGGTGTAGGCTGGAGCTGCTTC   | GCAAGCATTACTTACGCCCCGCCGCCAACAGTTTGTCC<br>AGTTCCGGGGATCCGTCGACCT | Deletion     |
| <i>iroN</i> | TGAGGGCAACAGCGCTACTTTAGACATTATTTAGGGAA<br>TGGTGTAGGCTGGAGCTGCTTC  | CGGCGGGCATAATCCATCAAAACGAGGCCGTCACACC<br>GGCTTCCGGGGATCCGTCGACCT | Deletion     |
| <i>sitA</i> | TCGATGATTAATTAACCACATTGTTGCGAGGGATACTAT<br>GGTGTAGGCTGGAGCTGCTTC  | GTAATCGCAGATTGACTCATTGTTGACTCCTCAGTCCGT<br>CTTCCGGGGATCCGTCGACCT | Deletion     |
| <i>yggE</i> | TATATCAGGGCAATGACTGCAATATGGAGGAGAGACTG<br>TGGTGTAGGCTGGAGCTGCTTC  | CCCAGGCCGGGTGAGATTACTGCGTGCTGGCGGCCGTT<br>GTTTCCGGGGATCCGTCGACCT | Deletion     |
| <i>yrbC</i> | CGCGGGCGAAACGAAATAATCTCAGGAGAATTGAGGC<br>ATGGTGTAGGCTGGAGCTGCTTC  | AGTTGCGGCGTCATTACTGTTTCTCGTCCAAAGTAATTT<br>TTTCCGGGGATCCGTCGACCT | Deletion     |
| <i>ugpB</i> | GATATCGCGCATCCCGGCACAAAAGAGAGATAACCGA<br>TGGTGTAGGCTGGAGCTGCTTC   | TCCGGCACTTATACACTTAAGATTTGCTCGCTTTCTCAA<br>ATTCCGGGGATCCGTCGACCT | Deletion     |
| <i>dppA</i> | AGGGCAAACAACATACATCACAATTGGAGCAGAAGA<br>ATGGTGTAGGCTGGAGCTGCTTC   | CGCAGCGCTCTTTTAATTATTCGACAGAGACGTTTTCGA<br>ATTCCGGGGATCCGTCGACCT | Deletion     |
| <i>pstS</i> | TCAAACAACGATTTACCGAAACCGTGCAGGAGACATTA<br>TGGTGTAGGCTGGAGCTGCTTC  | TCCGCCAATTCGTTAATTAATACAGCGCCTTACCGTTGC<br>TTTCCGGGGATCCGTCGACCT | Deletion     |
| <i>rbsB</i> | CAAAAAGCAGTAACAACGACTACAGGACATCTGAAAT<br>ATGGTGTAGGCTGGAGCTGCTTC  | TGACCCGTGTCGTTTATTACTGCTTGATGACCAGTTTCA<br>GTTCCGGGGATCCGTCGACCT | Deletion     |
| <i>sbp</i>  | CTTTGCTCATCACAACACAACATAAGCGAGTCTGGCGA<br>TGGTGTAGGCTGGAGCTGCTTC  | CGCCATTAGCGAAGTGATCTTTTTGCGCCTTCGCCAG<br>CCTTCCGGGGATCCGTCGACCT  | Deletion     |
| <i>glnH</i> | AGGGGATCGCCCCGTGGATAGAAAAGGAAATGCTATGA<br>AGGTGTAGGCTGGAGCTGCTTC  | CCAACATCAGGTGCTTTTATTTAGGTTCTGTACCGAACC<br>ATTCCGGGGATCCGTCGACCT | Deletion     |
| <i>thpA</i> | CAGGCATGGATTAGCGAATGGCAACGCGCCGTCAGCC<br>GTCTGTCTCTTATACACATCTCA  | CGCGGCGGCGCACAGCCCCGGAATCAGCCAGCCGGGA<br>ACTGTCTCTTATACACATCTGGT | CyaA' fusion |
| <i>metQ</i> | GCAAATAAAGTTTTTAATGGCGGCGCGGTGAAAGGCTG<br>GCTGTCTCTTATACACATCTCA  | CCTGAATAATATTACAGATTGTGGAATCAGCCTAAAACC<br>TGTCTCTTATACACATCTGGT | CyaA' fusion |
| STM14_0360  | GCCTCCAATGACTTCATGCTCGGCATTACTTACGCCTTT<br>CTGTCTCTTATACACATCTCA  | TCGGGAACCCACAGGACCAGCTATTTTACCGATAGTGT<br>CTGTCTCTTATACACATCTGGT | CyaA' fusion |
| <i>sfbA</i> | AGCGCCTTCCAGAAACCGGAATGGATGACCGCGACAC<br>CCCTGTCTCTTATACACATCTCA  | ATATCACCTCAGAAATTGGGGATGGCCACCGCTGCGA<br>CTGTCTCTTATACACATCTGGT  | CyaA' fusion |
| <i>gltI</i> | AAAGCCCTGTTCAAAGCACCGAATGATAAAGCGCTTAA<br>CCTGTCTCTTATACACATCTCA  | AATCGAGAGGACAGGAGTCCCGTCCCATTTAGTTTTAG<br>CTGTCTCTTATACACATCTGGT | CyaA' fusion |
| <i>wraB</i> | GGGGAATACGTCGCCGGTCTGGCAGTCAAACCTCAACG<br>GCCTGTCTCTTATACACATCTCA | TGCTTCTTGAGTTGGCATTGCAATCCTCCTGTTGAAGA<br>CTGTCTCTTATACACATCTGGT | CyaA' fusion |

|             |                                                                  |                                                                   |              |
|-------------|------------------------------------------------------------------|-------------------------------------------------------------------|--------------|
| <i>yefM</i> | GAGATAATCTGGTCAGGTAAAGGTGCGGTCCAACAAC<br>AACTGTCTCTTATACACATCTCA | GAAAATAGCGCGACAGGATCTCGTCGCGCGTTAAGGG<br>ACTGTCTCTTATACACATCTGGT  | CyaA' fusion |
| <i>potD</i> | ATTTATGAAGAGTATTATCAGAAGCTAAAAGCAGGACG<br>CCTGTCTCTTATACACATCTCA | TACGTTTCATCTGTAGGCCCGACAGGCGCTTTGGCTGAA<br>CTGTCTCTTATACACATCTGGT | CyaA' fusion |
| STM14_1918  | GAAGCGACGCAGCCGGATGATGTTATTTCGATTGCTCT<br>GCTGTCTCTTATACACATCTCA | AAGAGATGACTGGAGGGGTTTCCCCCTCCATACCCTAT<br>CTGTCTCTTATACACATCTGGT  | CyaA' fusion |
| <i>oppA</i> | GATAATATTTATGTGAAAACTTATATATTATCAAACATC<br>TGTCTCTTATACACATCTCA  | ACACCATGGGACAACCGCAGTTGTCCCATGTCTTGCCA<br>CTGTCTCTTATACACATCTGGT  | CyaA' fusion |
| <i>fliY</i> | GCGCTCTCTGAAAAATGGTTTGGCGCTGACGTGACCCA<br>ACTGTCTCTTATACACATCTCA | TGCCCCGGTGGCGCACTGCCTGCCGGCAACGTAGAAC<br>ACTGTCTCTTATACACATCTGGT  | CyaA' fusion |
| <i>yehZ</i> | GTCGCCGCAGATTACCTCCGACAAAAAGGGTGGGTGA<br>AGCTGTCTCTTATACACATCTCA | CGATTAACCGTGATTTTTTTTGGCAGCATCACTCACAGA<br>CTGTCTCTTATACACATCTGGT | CyaA' fusion |
| STM14_2773  | GGGCATAATTTTGTAGGTGCTTCAATTAGTTATAATTTCC<br>TGTCTCTTATACACATCTCA | ACTCCTTCAGCCAGCAACTCGCTAATTGTTATTCAACTC<br>TGTCTCTTATACACATCTGGT  | CyaA' fusion |
| <i>glpQ</i> | TTCCCCGATAAGGCGGTCATGTTCTGCAAAAAAATGA<br>CCTGTCTCTTATACACATCTCA  | GCCCTCATCCGGCGCGTCACTTCGACTATGGCAAACCT<br>CTGTCTCTTATACACATCTGGT  | CyaA' fusion |
| <i>cysP</i> | CACTTTGCCAGCGGGCGGAGCTGGACAAACTGTTGG<br>CGCTGTCTCTTATACACATCTCA  | GCGTCGGGAAGAAACGGCAAGCATTACTTACGCCCG<br>CCTGTCTCTTATACACATCTGGT   | CyaA' fusion |
| <i>rpsP</i> | CGCGTTGCGGGCGCTGATCAAAGAAGTAAAAAAGCAG<br>CTCTGTCTCTTATACACATCTCA | GCGGGCAGTTGCTTGCTCATCATGACCACCGTGACAGA<br>CTGTCTCTTATACACATCTGGT  | CyaA' fusion |
| <i>sitA</i> | TTTATTTCCCGCGCGTGGCCAGCGGAGGAAAATCGTC<br>ACTGTCTCTTATACACATCTCA  | GAGCATATACTGGTAGCCAAACGGCTCAACAAGCCAGT<br>CTGTCTCTTATACACATCTGGT  | CyaA' fusion |
| <i>yggE</i> | GGAACAGGGCAGACGTCGACAACGGCCGCCAGCACG<br>CAGCTGTCTCTTATACACATCTCA | GAGAAAACGCGCCTGGAAGCGCCCAGGCCGGGTGA<br>GACTGTCTCTTATACACATCTGGT   | CyaA' fusion |
| <i>pgk</i>  | CTGCCAGCCGTAGCGATGCTCGAAGAGCGCGCTAAGA<br>AGCTGTCTCTTATACACATCTCA | GCGATAAATCAACGGGCAGGAATCCCTGCCCGTAACGA<br>CTGTCTCTTATACACATCTGGT  | CyaA' fusion |
| <i>yrbC</i> | TCTATCTCTCAACAGAAAATTACTTTGGACGAGAAACA<br>GCTGTCTCTTATACACATCTCA | AGTGTCCGCCTCACGCGTCCAGGTGAGTTGCGGCGTC<br>ACTGTCTCTTATACACATCTGGT  | CyaA' fusion |
| <i>rpmD</i> | ATGGTCAACGCGTTTCCTTCATGGTTAAAGTTGAGGA<br>GCTGTCTCTTATACACATCTCA  | GAGCCTTCGGCCGGAGACAGAGTATTTAAACGCATCTC<br>CTGTCTCTTATACACATCTGGT  | CyaA' fusion |
| <i>ugpB</i> | AATCAGTTGCTGCGTCGTTTTGAGAAAGCGAGCAAATC<br>TCTGTCTCTTATACACATCTCA | GGATGGCGGTGCATGCACCTTATCCGGCACTTATACACC<br>TGTCTCTTATACACATCTGGT  | CyaA' fusion |
| <i>pstS</i> | AAGACCAGTATAAAAGACAGCAACGGTAAGGCGCTGT<br>ATCTGTCTCTTATACACATCTCA | AGGGCGGATAAGCGTAGCGCCATCCGCCAATTCGTAA<br>CTGTCTCTTATACACATCTGGT   | CyaA' fusion |

|             |                                                                   |                                                                   |              |
|-------------|-------------------------------------------------------------------|-------------------------------------------------------------------|--------------|
| <i>rbsB</i> | GCCAAATATCCGGTTGACCTGAAACTGGTCATCAAGCA<br>GCTGTCTCTTATACACATCTCA  | TCTGTCGCCATCAGGCCATAGTTGACCCGTGTCGTTTAC<br>TGTCTCTTATACACATCTGGT  | CyaA' fusion |
| <i>sbp</i>  | TTCGCTAATGGCGGTACGTTTCGACCAAATCAGCAAACG<br>CCTGTCTCTTATACACATCTCA | ACCCGGTAACATAATACGTTACCGGGTTTATAAACGGTC<br>TGTCTCTTATACACATCTGGT  | CyaA' fusion |
| <i>hupA</i> | GCGTTTGTCTCTGGTAAAGCTCTGAAAGACGCAGTTAA<br>GCTGTCTCTTATACACATCTCA  | ATGAGCCCCCTTCGATAAAACTGTTACAGTTATGCGTCC<br>TGTCTCTTATACACATCTGGT  | CyaA' fusion |
| <i>phoN</i> | AATTTATTGAGTAAAGAAGATCACCCCAAATTAATTAC<br>CTGTCTCTTATACACATCTCA   | TCATTTGCTGTGGCCAGTTTGCGGGAAGACTTTACCT<br>CTGTCTCTTATACACATCTGGT   | CyaA' fusion |
| <i>glnH</i> | AACGAAATCTACAAAAAATGGTTCGGTACAGAACCTAA<br>ACTGTCTCTTATACACATCTCA  | GTCCTCACTACCGGGCCACAAGCCAACATCAGGTCGTT<br>CTGTCTCTTATACACATCTGGT  | CyaA' fusion |
| <i>pstS</i> | GAAGACCAGTATAAAAGACAGCAACGGTAAGGCGCTG<br>TATATTCCGGGGATCCGTCGACC  | GGGCGGATAAGCGTAGCGCCATCCGCCAATTCGTTAATT<br>AATTGTGTAGGCTGGAGCTGC  | 2HA fusion   |
| <i>dppA</i> | TCCATTAGGCAAACATCACTTCGAAAACGTCTCTGTGCG<br>AAATTCCGGGGATCCGTCGACC | CCGGCCTACACAACACCGGGGCGCAGCGCTCTTTAAT<br>TAATTGTGTAGGCTGGAGCTGC   | 2HA fusion   |
| <i>cysP</i> | CGGCGGCGAGCTGGACAAACTGTTGGCGGGCGGGGCGT<br>AAGATTCCGGGGATCCGTCGACC | AAGCCGGGCAGCACGCGTCGGGAAGAAACGGCAAGC<br>ATTAATTGTGTAGGCTGGAGCTGC  | 2HA fusion   |
| STM14_1918  | GGAAGCGACGCAGCCGGATGATGTTATTCGCATTGCTC<br>TGATTCCGGGGATCCGTCGACC  | AGAGATGACTGGAGGGGTTTCCCCCTCCATACCCTATTT<br>AATTGTGTAGGCTGGAGCTGC  | 2HA fusion   |
| <i>ycfM</i> | CGAGATAATCTGGTCAGGTAAAGGTGCGGTCCAACAAC<br>AAATTCCGGGGATCCGTCGACC  | AAAATAGCGCGACAGGATCTCGTCGCGGTTAAGGGAT<br>TAATTGTGTAGGCTGGAGCTGC   | 2HA fusion   |
| <i>rbsB</i> | GGCCAAATATCCGGTTGACCTGAAACTGGTCATCAAGC<br>AGATTCCGGGGATCCGTCGACC  | CTGTCGCCATCAGGCCATAGTTGACCCGTGTCGTTTATT<br>AATTGTGTAGGCTGGAGCTGC  | 2HA fusion   |
| <i>potD</i> | CATTTATGAAGAGTATTATCAGAAGCTAAAAGCAGGAC<br>GCATTCCGGGGATCCGTCGACC  | ACGTTTCATCTGTAGGCCCGACAGGCGCTTTGGCTGAAT<br>TAATTGTGTAGGCTGGAGCTGC | 2HA fusion   |
| STM14_2773  | AGGGCATAATTTTGTAGGTGCTTCAATTAGTTATAATTC<br>ATTCCGGGGATCCGTCGACC   | CTCCTTCAGCCAGCAACTCGCTAATTGTTATTCAACTTC<br>AATTGTGTAGGCTGGAGCTGC  | 2HA fusion   |
| <i>yggE</i> | TGGAACAGGGCAGACGTCGACAACGGCCGCCAGCACG<br>CAGATTCCGGGGATCCGTCGACC  | AGAAAACGCGGCCTGGAAGCGCCAGGCCGGGTGAGA<br>TTAATTGTGTAGGCTGGAGCTGC   | 2HA fusion   |
| <i>metQ</i> | CGCAAATAAAGTTTTTAATGGCGGCGGGTCAAAGGCT<br>GGATTCCGGGGATCCGTCGACC   | CTGAATAATATTACAGATTGTGGAATCAGCCTAAAATT<br>AATTGTGTAGGCTGGAGCTGC   | 2HA fusion   |
| <i>yehZ</i> | AGTCGCCGAGATTACCTCCGACAAAAGGGTGGGTG<br>AAGATTCCGGGGATCCGTCGACC    | GATTAACCGTGATTTTTTTGGCAGCATCACTCACAGATT<br>AATTGTGTAGGCTGGAGCTGC  | 2HA fusion   |
| <i>hupA</i> | GGCGTTTGTCTCTGGTAAAGCTCTGAAAGACGCAGTTA<br>AGATTCCGGGGATCCGTCGACC  | TGAGCCCCCTTCGATAAAACTGTTACAGTTATGCGTCTT<br>AATTGTGTAGGCTGGAGCTGC  | 2HA fusion   |



|             |                                                                                                            |                                                                  |                |
|-------------|------------------------------------------------------------------------------------------------------------|------------------------------------------------------------------|----------------|
| <i>glnH</i> | TAACGAAATCTACAAAAAATGGTTCGGTACAGAACCTA<br>AATATCCGTATGTGTTCCCTGATTATGCTAGCCTCTAATGT<br>AGGCTGGAGCTGCTTCG   | GCGTCCTCACTACCGGGCCACAAGCCAACATCAGGTC<br>GTTATTCGGGGATCCGTGCGACC | 2HA fusion     |
| <i>phoN</i> | TAATTTATTGAGTAAAGAAGATCACCCCAAACCTTAATTA<br>CTATCCGTATGATGTTCCCTGATTATGCTAGCCTCTGATGT<br>AGGCTGGAGCTGCTTCG | TTTCATTTGCTGTGGCCAGTTTGCGGGAAGACTTTTAC<br>CTATTCGGGGATCCGTGCGACC | 2HA fusion     |
| <i>tbpA</i> | TTTTAAATCGGCGTGGTTTGCG                                                                                     | AAACGCCTGCCAGAATGAGAAG                                           | Diagnostic PCR |
| <i>metQ</i> | CGGCTATCAGTACGGTTATATTG                                                                                    | CAGCATTGGTGTAATCCTGAC                                            | Diagnostic PCR |
| STM14_0360  | AATTTGGCGAGGAGATGGATTTC                                                                                    | AAGTTAAGCCCATACCAGAAACG                                          | Diagnostic PCR |
| <i>foxA</i> | TATCAACATGCCACTAACTTTGCG                                                                                   | TATGGACGAATACAGCGCATTG                                           | Diagnostic PCR |
| <i>sfbA</i> | GTTGGCGTTAAGACCTCTTATC                                                                                     | GTACCGACAATGCCAAAAATCTC                                          | Diagnostic PCR |
| <i>fepA</i> | GCCTCTTTCATTATAACCCTGTG                                                                                    | CAGATGTTCAGCTTTACGCTTG                                           | Diagnostic PCR |
| <i>gltI</i> | ATTCTGGCACGTCTATTGCTTTG                                                                                    | ATACATCTACTCCGAAAAAAAAAGGG                                       | Diagnostic PCR |
| <i>fhuE</i> | CGAAAAATGACTACATGCTGGAC                                                                                    | TAAAGAGAACATCACTAACCTGG                                          | Diagnostic PCR |
| <i>ycfM</i> | GAGCCATAACCGTTCATTATC                                                                                      | ATGACGTAAAAAATGGGCTGGTG                                          | Diagnostic PCR |
| <i>potD</i> | CAGTGAGGTAACGATTTTACGC                                                                                     | ATACGGTGGAAGTGAATCTTGAG                                          | Diagnostic PCR |
| STM14_1918  | AAGCGTATCAACGGAAAACGTG                                                                                     | ACATAGTTGGTTGTACAACCCG                                           | Diagnostic PCR |
| <i>oppA</i> | GTTGTCAGAAATAACGTGCGAC                                                                                     | ATAAGAATAAACAGCGTCGGAATC                                         | Diagnostic PCR |
| <i>fliY</i> | CCAGCAATATAAAGCGCATCAG                                                                                     | AAGCGCGTTAAGTGATGTAGTG                                           | Diagnostic PCR |
| <i>yehZ</i> | GCAAGTTCAACGCTTTTATCGG                                                                                     | TACAAAGCACAGCGTAAACAGC                                           | Diagnostic PCR |
| STM14_2773  | TGAAAATGTGGTCAGAAATGAGTG                                                                                   | TCGCAGCAATAATAAACGTTCTG                                          | Diagnostic PCR |
| <i>cysP</i> | AACGCAAAACGTCATTGATGGC                                                                                     | CAAACACGCCATTAATAAACGAC                                          | Diagnostic PCR |
| <i>iroN</i> | ACAGAGAGTCATATTGCAAAATCC                                                                                   | AAAAAGTTCAGGAGACCGTGAG                                           | Diagnostic PCR |
| <i>sitA</i> | TTTTTCACGAGCGATACGTTTAC                                                                                    | AACGCTTTAAATAACGTAGACTTAC                                        | Diagnostic PCR |
| <i>yggE</i> | AACGCATTATCAACATTCTGGTTG                                                                                   | GAAGTTCATCACAAAATCATTGCG                                         | Diagnostic PCR |
| <i>yrbC</i> | AACGTCTATCCTCAAAGATGGG                                                                                     | TTTTTGCCCTGGTTCACAAGGTG                                          | Diagnostic PCR |
| <i>ugpB</i> | GAGAATAATGTCGTACCTATCCG                                                                                    | GACAAATTGGCTGGAAAAACCAA                                          | Diagnostic PCR |
| <i>dppA</i> | GACATTCTATTGACAGATTGTAGG                                                                                   | CGGAGAATGAACTGCAACATAAC                                          | Diagnostic PCR |
| <i>pstS</i> | TTGCGCAAACAGTCTAATTCATC                                                                                    | AACATCAATAGCACAAATCAGCGC                                         | Diagnostic PCR |
| <i>rbsB</i> | TGATTCTCGGCTTCCTTAATAATG                                                                                   | TAAGGATATGATCGGCATTAATGC                                         | Diagnostic PCR |
| <i>sbp</i>  | TGTACTGATTGTTTTTGCGCGC                                                                                     | ATCACCGCCAGTAAAAAGTAGC                                           | Diagnostic PCR |
| <i>glnH</i> | CCCTGTATCTCTACTTTGTTATTC                                                                                   | ACTGCATATGTCGTTCCCTGTTAC                                         | Diagnostic PCR |
| <i>pstS</i> | GCGGGTCTACCGTGAAGTGG                                                                                       | CTTGGCCAGGAGGAGATGATCAAT                                         | Diagnostic PCR |

|             |                            |                            |                |
|-------------|----------------------------|----------------------------|----------------|
| <i>dppA</i> | CGTATGGCGGAAATGATCCAGG     | G TTCAGCCAGCAGTTGAGCATGA   | Diagnostic PCR |
| <i>cysP</i> | TTTGCCGAGCGTGGTCTGGG       | GAAACCGTTCACTGAGAACAGCG    | Diagnostic PCR |
| STM14_1918  | AAGCGCAACGCCTGTACACCAC     | GCTTACCCTGAGTTACGATCGTT    | Diagnostic PCR |
| <i>ycfM</i> | CCACTATGACTGGAACGGCG       | CCGGATCGCAACACGACCAG       | Diagnostic PCR |
| <i>rbsB</i> | TGCAAGGCATTGCCGGAACATC     | CGCCCGTGCAGGCGATAAAC       | Diagnostic PCR |
| <i>potD</i> | ATCCGGCGAATCCGTATATGGAAG   | CGAGATGCCGCTTGGCATGGA      | Diagnostic PCR |
| STM14_2773  | GGGTATCTCGAAGGATGTGG       | ACAATTAGCCTCCCTGTCGC       | Diagnostic PCR |
| <i>yggE</i> | ACGGTAAAAGCATTCTGAAAGGGT   | AGCCTCTCTATGAATGCCGGATG    | Diagnostic PCR |
| <i>metQ</i> | CTGGATGAGCTCAAGGACGGTT     | GGTTGCGGTGCTTTGAACGGGT     | Diagnostic PCR |
| <i>yehZ</i> | CTCAGCCGTTATCTGAAAGAGGGC   | GCCGACTCCCCACAGCATGAC      | Diagnostic PCR |
| <i>hupA</i> | CAAGCGATAAACACATTGTAAGG    | TACTTAACTGCGTCTTTCAGAG     | Diagnostic PCR |
| <i>glnH</i> | CTAAATCAGTGCCCCAAAACGGT    | GCTAGCATAATCAGGAACATCATA   | Diagnostic PCR |
| <i>phoN</i> | TCGGGGACAAAAGTTAAACAAAATGC | GCTAGCATAATCAGGAACATCATA   | Diagnostic PCR |
| <i>hupA</i> | GAAACGCTGGATCCCGCTATTGA    | AAAACGTTCAAGCTTATGCGTCTTAC | Cloning        |
| <i>glnH</i> | TATTGTGCACAGGATCCTTTCACG   | CGGGCCACAAGCTTACATCAGGT    | Cloning        |
| <i>phoN</i> | ATGACTGATGGATCCTATCGGGGT   | AGTTTGCGGGAAGCTTTTCACCTT   | Cloning        |

1 Table S2. OMV-associated SPI-1 and SPI-2 T3SS proteins

2

| 14028S locus | LT2 locus | Gene name    | Description                                                                | Location <sup>1</sup> | Signal peptide <sup>2</sup> |
|--------------|-----------|--------------|----------------------------------------------------------------------------|-----------------------|-----------------------------|
| SPI-1        |           |              |                                                                            |                       |                             |
| STM14_3472   | STM2873   | <i>prgI</i>  | needle complex major subunit                                               | Unknown               | yes                         |
| STM14_3484   | STM2885   | <i>sipB</i>  | translocation machinery component                                          | Extracellular         | no                          |
| STM14_3483   | STM2884   | <i>sipC</i>  | translocation machinery component                                          | Extracellular         | yes                         |
| STM14_3481   | STM2882   | <i>sipA</i>  | secreted effector protein                                                  | Extracellular         | yes                         |
| STM14_1237   | STM1091   | <i>sopB</i>  | secreted effector protein                                                  | Unknown               | yes                         |
| STM14_2557   | STM2066   | <i>sopA</i>  | secreted effector protein                                                  | Unknown               | yes                         |
| STM14_2244   | STM1855   | <i>sopE2</i> | secreted effector protein                                                  | Extracellular         | yes                         |
| STM14_3482   | STM2883   | <i>sipD</i>  | translocation machinery component                                          | Extracellular         | yes                         |
| STM14_3477   | STM2878   | <i>sptP</i>  | protein tyrosine phosphatase,<br>translocated protein antagonizing sopE/E2 | Extracellular         | yes                         |
| STM14_3476   | STM2877   | <i>iagB</i>  | invasion protein precursor                                                 | Periplasm             | no                          |
| SPI-2        |           |              |                                                                            |                       |                             |
| STM14_1696   | STM1400   | <i>sseC</i>  | translocation machinery component                                          | Cytoplasm             | no                          |
| STM14_3110   | STM1398   | <i>sseB</i>  | translocation machinery component                                          | Unknown               | yes                         |
| STM14_1697   | STM1401   | <i>sseD</i>  | translocation machinery component                                          | Cytoplasm             | no                          |

3

4 <sup>1</sup> Location was predicted using PSORTb ver. 3.0.2 (<http://www.psort.org/psortb/>).

5 <sup>2</sup> Secretion signal peptide was assessed using SecretomeP 2.0 (<http://www.cbs.dtu.dk/services/SecretomeP/>).

6

7 Table S3. Top 48 OMV-associated proteins with unique matches of 4 or more in acidic MgM

| 14028S locus | LT2 locus | Gene        | Description                                    | survival assay <sup>1</sup> | secretion assay <sup>2</sup> |
|--------------|-----------|-------------|------------------------------------------------|-----------------------------|------------------------------|
| STM14_0127   | STM0108   | <i>tbpA</i> | thiamine-binding periplasmic protein           | yes                         | yes                          |
| STM14_0287   | STM0245   | <i>metQ</i> | putative outer membrane lipoprotein            | yes                         | yes                          |
| STM14_0360   | STM0306   |             | homolog of sapA                                | yes                         | yes                          |
| STM14_0426   | STM0364   | <i>foxA</i> | ferrioxamine receptor                          | yes                         |                              |
| STM14_0600   | STM0510   | <i>sfbA</i> | putative ABC-type transport system ATPase      | yes                         | yes                          |
| STM14_0682   | STM0585   | <i>fepA</i> | outer membrane receptor FepA                   | yes                         |                              |
| STM14_0773   | STM0665   | <i>gltI</i> | glutamate/aspartate transporter                | yes                         | yes                          |
| STM14_1272   | STM1119   | <i>wraB</i> | trp-repressor binding protein                  |                             | yes                          |
| STM14_1378   | STM1204   | <i>fhuE</i> | outer membrane receptor for Fe(III)-coprogen   | yes                         |                              |
| STM14_1381   | STM1207   | <i>ycfM</i> | putative outer membrane lipoprotein            | yes                         | yes                          |
| STM14_1397   | STM1222   | <i>potD</i> | spermidine/putrescine transporter              | yes                         | yes                          |
| STM14_1696   | STM1400   | <i>sseC</i> | secretion system effector                      |                             |                              |
| STM14_1918   | STM1586   |             | putative Periplasmic protein                   | yes                         | yes                          |
| STM14_1936   | STM1599   | <i>pdgL</i> | periplasmic dipeptidase                        |                             |                              |
| STM14_1977   | STM1633   |             | putative Periplasmic binding protein           |                             |                              |
| STM14_2050   | STM1698   |             | putative inner membrane protein                |                             |                              |
| STM14_2110   | STM1746.S | <i>oppA</i> | oligopeptide transport protein                 | yes                         | yes                          |
| STM14_2116   | STM1751   | <i>hms</i>  | DNA-binding protein HLP-II                     |                             |                              |
| STM14_2372   | STM1954   | <i>fliY</i> | putative Periplasmic binding transport protein | yes                         | yes                          |
| STM14_2669   | STM2165   | <i>yehZ</i> | putative ABC superfamily transport protein     | yes                         | yes                          |
| STM14_2773   | STM2245   |             | putative outer membrane protein                | yes                         | yes                          |
| STM14_2817   | STM2282   | <i>glpQ</i> | glycerophosphodiester phosphodiesterase        |                             | yes                          |
| STM14_2946   | STM2395   | <i>pgtE</i> | outer membrane protein E                       |                             |                              |
| STM14_3002   | STM2444   | <i>cysP</i> | thiosulfate transport protein                  | yes                         | yes                          |
| STM14_3110   | STM1398   | <i>sseB</i> | secretion system effector                      |                             |                              |
| STM14_3279   | STM2676   | <i>rpsP</i> | 30S ribosomal subunit protein S16              |                             | yes                          |
| STM14_3348   | STM2777   | <i>iroN</i> | outer membrane receptor FepA                   | yes                         |                              |
| STM14_3458   | STM2861   | <i>sitA</i> | fur regulated Salmonella iron transporter      | yes                         | yes                          |
| STM14_3705   | STM3065   | <i>yggE</i> | putative Periplasmic immunogenic protein       | yes                         | yes                          |
| STM14_3709   | STM3069   | <i>pgk</i>  | phosphoglycerate kinase                        |                             | yes                          |
| STM14_3752   | STM3107   | <i>yggN</i> | putative Periplasmic protein                   |                             |                              |
| STM14_3998   | STM3310   | <i>yrbC</i> | putative ABC superfamily transport protein     | yes                         | yes                          |
| STM14_4125   | STM3422   | <i>rpmD</i> | 50S ribosomal subunit protein L30              |                             | yes                          |
| STM14_4128   | STM3425   | <i>rplF</i> | 50S ribosomal subunit protein L6               |                             |                              |
| STM14_4129   | STM3426   | <i>rpsH</i> | 30S ribosomal subunit protein S8               |                             |                              |
| STM14_4157   | STM3453   | <i>fkpA</i> | FKBP-type peptidyl-prolyl cis-trans isomerase  |                             |                              |
| STM14_4283   | STM3557   | <i>ugpB</i> | sn-glycerol 3-phosphate transport protein      | yes                         | yes                          |
| STM14_4375   | STM3630   | <i>dppA</i> | dipeptide transport protein                    | yes                         |                              |
| STM14_4489   | STM3727   | <i>rpmG</i> | 50S ribosomal subunit protein L33              |                             |                              |
| STM14_4652   | STM3857   | <i>pstS</i> | high-affinity phosphate transporter            | yes                         | yes                          |
| STM14_4681   | STM3884   | <i>rbsB</i> | D-ribose transport protein                     | yes                         | yes                          |
| STM14_4887   | STM4063   | <i>sbp</i>  | sulfate transport protein                      | yes                         | yes                          |
| STM14_4902   | STM4077   | <i>yneA</i> | putative sugar transport protein               |                             |                              |
| STM14_5011   | STM4170   | <i>hupA</i> | transcriptional regulator HU subunit alpha     |                             | yes                          |
| STM14_5193   | STM4319   | <i>phoN</i> | non-specific acid phosphatase                  |                             | yes                          |

|            |         |             |                                     |     |     |
|------------|---------|-------------|-------------------------------------|-----|-----|
| STM14_5278 | STM4394 | <i>rplI</i> | 50S ribosomal subunit protein L9    |     |     |
| STM14_964  | STM0830 | <i>glnH</i> | glutamine high-affinity transporter | yes | yes |

8

9 <sup>1</sup> *Salmonella* strains lacking OMV-associated proteins were subjected to macrophage infection to assess their  
10 survival ability.

11 <sup>2</sup> *Salmonella* strains producing CyaA'-tagged proteins were subjected to macrophage infection and the translocation  
12 of CyaA'-tagged proteins into the host cytoplasm was examined.
